# Supplementary material
Source: Research Square preprint supplement (doi:10.21203/rs.3.rs-9862225/v1)

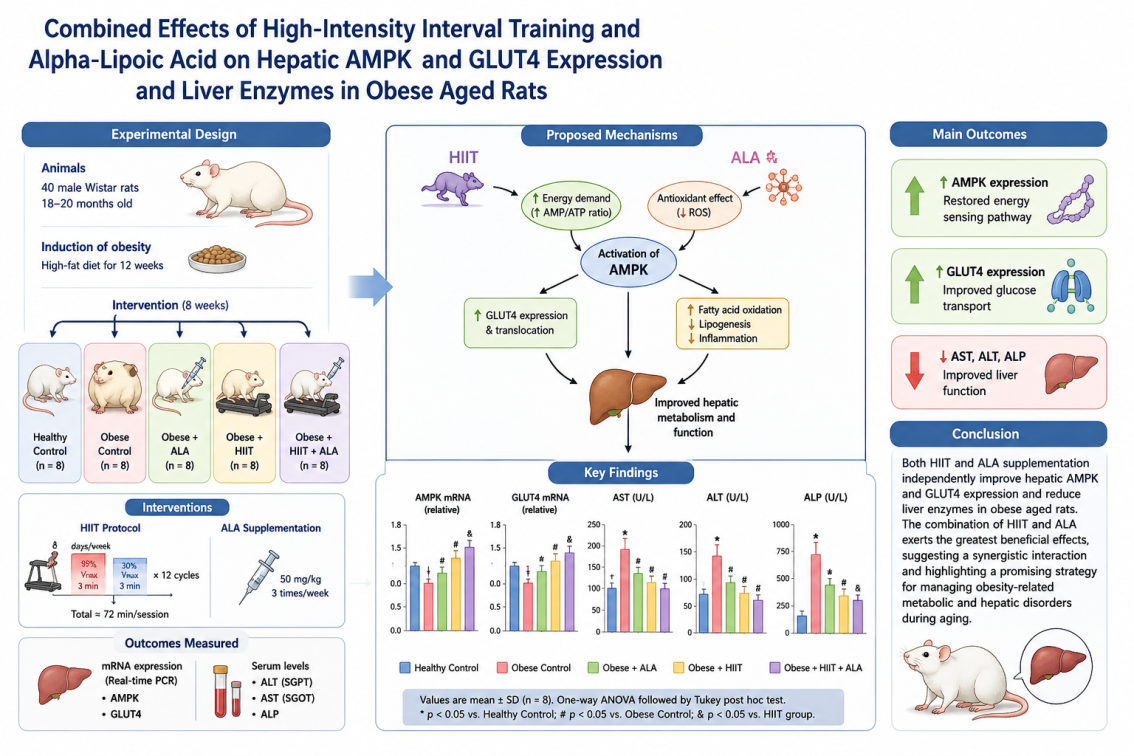


**Graphic Abstract**

Supplement: Supplementary file 1 [file 27ea3bdc105460d1f1136de6.docx]
